# Supplementary material for: Mechanical allodynia in mice with tenascin-X deficiency associated with Ehlers-Danlos syndrome
Source: PubMed Central journal article supplement (PMC7162960; doi:10.1038/s41598-020-63499-2), 2020-04-16
Supplement: 41598_2020_63499_MOESM1_ESM.pdf [file 41598_2020_63499_MOESM1_ESM.pdf]

## Supplementary Information

### **Mechanical allodynia in mice with tenascin-X deficiency associated with Ehlers-Danlos syndrome**

Emiko Okuda-Ashitaka<sup>1,\*</sup>, Yuka Kakuchi<sup>1</sup>, Hiroaki Kakumoto<sup>1</sup>, Shota Yamanishi<sup>1</sup>, Hiroki Kamada<sup>1</sup>, Takafumi Yoshidu<sup>1</sup>, Satoshi Matsukawa<sup>1</sup>, Naoya Ogura<sup>1</sup>, Sadahito Uto<sup>1</sup>, Toshiaki Minami<sup>2</sup>, Seiji Ito<sup>2</sup>, Ken-ichi Matsumoto<sup>3</sup>

<sup>1</sup>Department of Biomedical Engineering, Osaka Institute of Technology, Osaka 535-8585, Japan

<sup>2</sup>Department of Anesthesiology, Osaka Medical College, Takatsuki 569-8686, Japan

<sup>3</sup>Department of Biosignaling and Radioisotope Experiment, Interdisciplinary Center for Science Research, Organization for Research and Academic Information, Shimane University, Izumo 693-8501, Japan

\*Corresponding author: e-mail address: emiko.ashitaka@oit.ac.jp

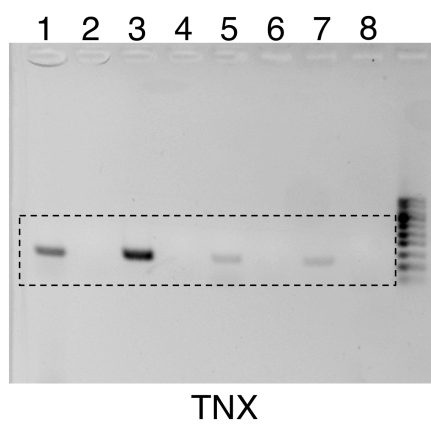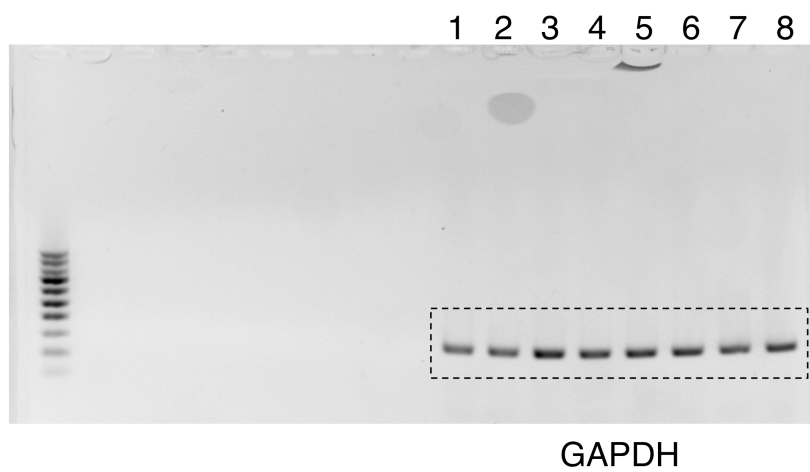

**Supplementary Figure 1** Full-length gels in Figure 1a. The dotted rectangles indicate cropped parts of the gels.
